# Supplementary material
Source: PubMed Central journal article supplement (PMC7657198)
Supplement: CAS-104-481-s001.pdf [file CAS-104-481-s001.pdf]

Figure S1 [Y Ohashi]

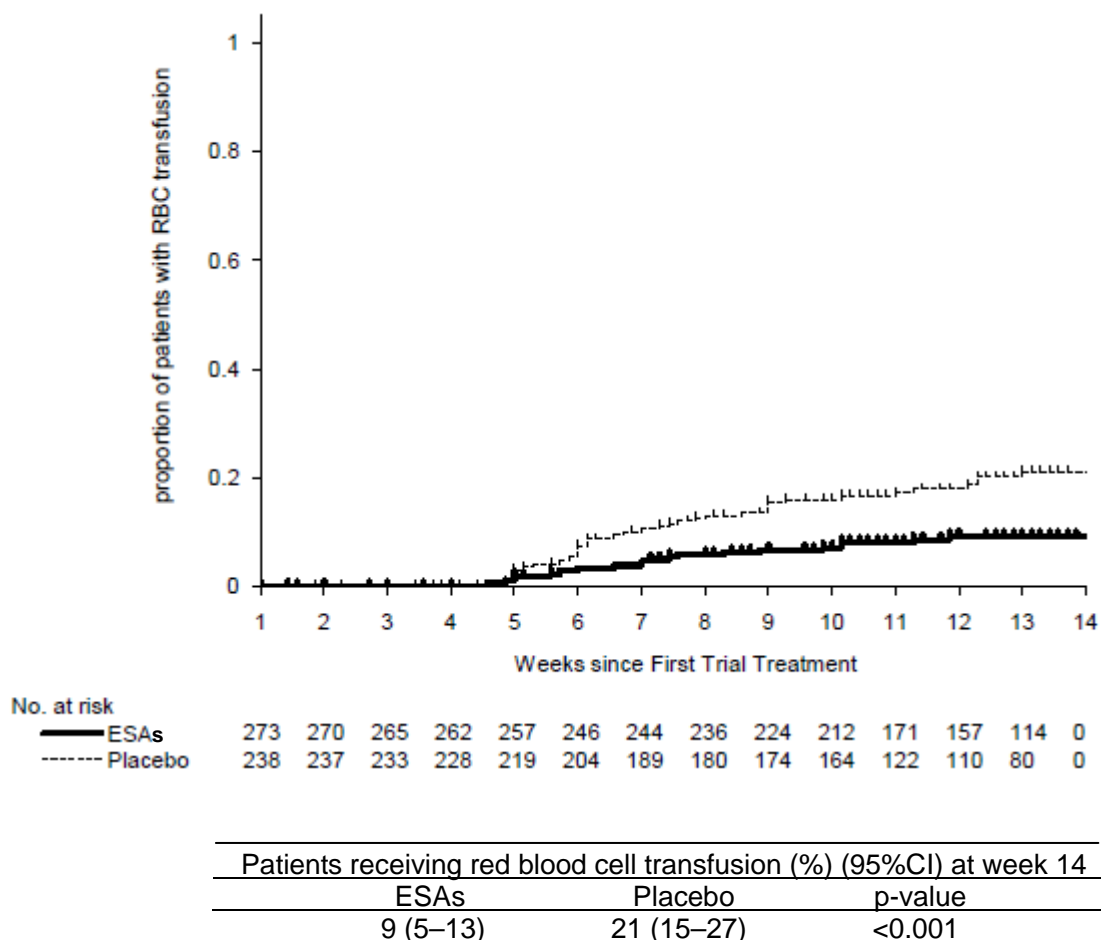

Figure S1. Kaplan-Meier curve of the time to first red blood cell transfusion during the period from week 5 of treatment to the end of the treatment period for all patients treated with ESAs or placebo

A lower percentage of patients received red blood cell transfusion from week 5 until week 14 in ESAs-treated group (9%) than in placebo-treated group (21%) ( $p < 0.001$ ).
