# Supplementary material
Source: PubMed Central journal article supplement (PMC7657198)
Supplement: CAS-104-481-s002.pdf [file CAS-104-481-s002.pdf]

Figure S2 [Y Ohashi]

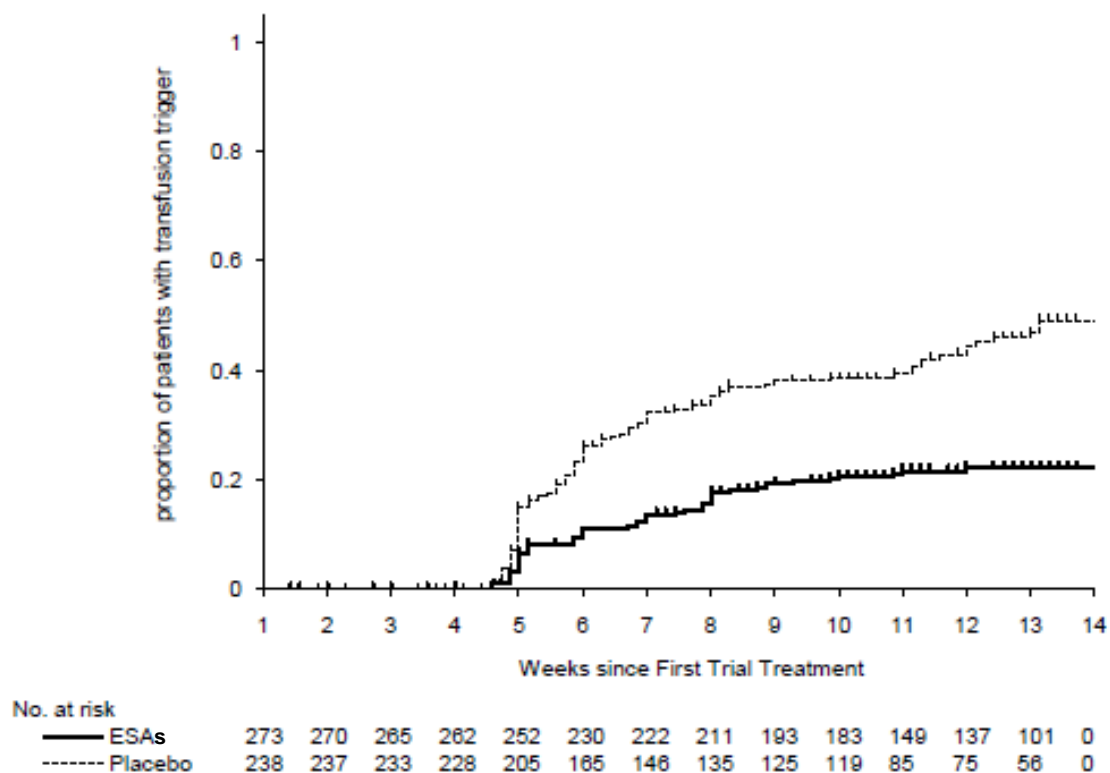

| Patients reaching transfusion trigger (%) (95%CI) at week 14 |            |         |
|--------------------------------------------------------------|------------|---------|
| ESAs                                                         | Placebo    | p-value |
| 22 (17–27)                                                   | 49 (41–57) | <0.001  |

**Fig. S2.** Kaplan-Meier curve of the time to transfusion trigger during the period from week 5 of treatment to the end of the treatment period for all patients treated with an ESA or placebo.

The percentage of patients who reached the transfusion trigger, defined as either receiving a red blood cell transfusion or having a hemoglobin concentration below 8 g/dL, from week 5 until week 14 was significantly lower in the ESA-treated group (22%) compared to the placebo-treated group (49%) ( $p < 0.001$ ).
